# Supplementary material for: Exploring the coordination modes of pyrrolyl ligands in bis(imido) uranium(vi) complexes
Source: Royal Society of Chemistry journal article supplement (doi:10.1039/c002440f), 2010-01-01
Supplement: c002440f.pdf [file c002440f.pdf]

## Supplementary Information

for

### Exploring the Coordination Modes of Pyrrolyl Ligands in Bis(imido) Uranium(VI) Complexes

**Douglas L. Swartz II,<sup>a</sup> Liam P. Spencer,<sup>b</sup> Brian L. Scott,<sup>b</sup> Aaron L.  
Odom,<sup>\*c</sup> James M. Boncella<sup>\*b</sup>**

<sup>a</sup>*Kutztown University, Department of Chemistry, Kutztown, PA 19530, USA. Email:*

*[swartz@kutztown.edu](mailto:swartz@kutztown.edu)*

<sup>b</sup>*Materials, Physics and Applications Division, Los Alamos National Laboratory, Los*

*Alamos, NM 87545, USA. email: [boncella@lanl.gov](mailto:boncella@lanl.gov)*

<sup>c</sup>*Michigan State University, Department of Chemistry, East Lansing, MI 48824, U. S. A.*

*E-mail: [odom@chemistry.msu.edu](mailto:odom@chemistry.msu.edu)*

**Table S1.** X-ray Crystallographic Data for Complexes **3** and **4**.

| Crystal Data                                       | <b>3-2 CH<sub>2</sub>Cl<sub>2</sub></b>                                                        | <b>4</b>                                                        |
|----------------------------------------------------|------------------------------------------------------------------------------------------------|-----------------------------------------------------------------|
| Empirical formula                                  | C <sub>58</sub> H <sub>68</sub> Cl <sub>4</sub> N <sub>4</sub> O <sub>2</sub> P <sub>2</sub> U | C <sub>27</sub> H <sub>46</sub> N <sub>4</sub> O <sub>2</sub> U |
| Crystal habit, color                               | Block, dark red                                                                                | Block, dark red                                                 |
| Crystal size (mm)                                  | 0.14 x 0.14 x 0.10                                                                             | 0.32 x 0.08 x 0.06                                              |
| Crystal system                                     | Monoclinic                                                                                     | Orthorhombic                                                    |
| Space group                                        | C 2/c                                                                                          | P nma                                                           |
| Volume (Å <sup>3</sup> )                           | 5369.4(13)                                                                                     | 2816(2)                                                         |
| a(Å)                                               | 17.705(2)                                                                                      | 17.189(8)                                                       |
| b(Å)                                               | 19.068(3)                                                                                      | 14.566(7)                                                       |
| c(Å)                                               | 16.984(2)                                                                                      | 11.246(5)                                                       |
| α(°)                                               | 90                                                                                             | 90                                                              |
| β(°)                                               | 110.5310(10)                                                                                   | 90                                                              |
| γ(°)                                               | 90                                                                                             | 90                                                              |
| Z                                                  | 4                                                                                              | 4                                                               |
| Formula weight<br>(g/mol)                          | 1294.93                                                                                        | 696.71                                                          |
| Density<br>(calculated)(Mg/m <sup>3</sup> )        | 1.602                                                                                          | 1.644                                                           |
| Absorption<br>coefficient (cm <sup>-1</sup> )      | 3.329                                                                                          | 5.794                                                           |
| F <sub>000</sub>                                   | 2600                                                                                           | 1376                                                            |
| Radiation                                          | MoKα, 0.71073 Å                                                                                | MoKα, 0.71073 Å                                                 |
| Data Refinement                                    |                                                                                                |                                                                 |
| Final R indices <sup>a</sup>                       | R <sub>1</sub> = 0.0396, wR <sub>2</sub> = 0.0725                                              | R <sub>1</sub> = 0.0442, wR <sub>2</sub> = 0.0884               |
| Largest diff. peak<br>and hole (eÅ <sup>-3</sup> ) | 0.732 and -0.543                                                                               | 0.871 and -1.205                                                |

<sup>a</sup>Number of observed reflections: **3**, 5550 ( $I_o > 2\sigma I_o$ ),  $R_1 = \sum (|F_o| - |F_c|) / \sum |F_o|$ ,  $wR_2 = [ \sum w (|F_o|^2 - |F_c|^2)^2 / \sum w F_o^4 ]^{1/2}$ ,  $w = [ \sigma^2 F_o^2 + (0.0315 \cdot p)^2 ]^{-1}$ ,  $p = [F_o^2 + 2 \cdot F_c^2] / 3$ . **4**, 2793 ( $I_o > 2\sigma I_o$ ),  $R_1 = \sum (|F_o| - |F_c|) / \sum |F_o|$ ,  $wR_2 = [ \sum w (|F_o|^2 - |F_c|^2)^2 / \sum w F_o^4 ]^{1/2}$ ,  $w = [ \sigma^2 F_o^2 + (0.0415 \cdot p)^2 ]^{-1}$ ,  $p = [F_o^2 + 2 \cdot F_c^2] / 3$ .

**Table S2.** X-ray Crystallographic Data for Complexes **5** and **6**.

| Crystal Data                                       | <b>5</b>                                         | <b>6</b>                                                        |
|----------------------------------------------------|--------------------------------------------------|-----------------------------------------------------------------|
| Empirical formula                                  | C <sub>37</sub> H <sub>50</sub> N <sub>4</sub> U | C <sub>46</sub> H <sub>73</sub> N <sub>4</sub> P <sub>2</sub> U |
| Crystal habit, color                               | Needle, black                                    | Needle, black                                                   |
| Crystal size (mm)                                  | 0.14 x 0.11 x 0.08                               | 0.20 x 0.18 x 0.02                                              |
| Crystal system                                     | Triclinic                                        | Monoclinic                                                      |
| Space group                                        | P $\bar{1}$                                      | P 2 <sub>1</sub> /c                                             |
| Volume (Å <sup>3</sup> )                           | 1696.1(2)                                        | 4540.9(17)                                                      |
| a(Å)                                               | 11.1415(9)                                       | 11.649(3)                                                       |
| b(Å)                                               | 12.5846(11)                                      | 17.676(4)                                                       |
| c(Å)                                               | 12.7942(11)                                      | 22.136(5)                                                       |
| α(°)                                               | 87.3010(1)                                       | 90                                                              |
| β(°)                                               | 80.7680(1)                                       | 94.986(3)                                                       |
| γ(°)                                               | 73.3150(1)                                       | 90                                                              |
| Z                                                  | 2                                                | 4                                                               |
| Formula weight<br>(g/mol)                          | 788.84                                           | 982.05                                                          |
| Density<br>(calculated)(Mg/m <sup>3</sup> )        | 1.545                                            | 1.436                                                           |
| Absorption<br>coefficient (cm <sup>-1</sup> )      | 4.815                                            | 3.680                                                           |
| F <sub>000</sub>                                   | 784                                              | 1996                                                            |
| Radiation                                          | MoKα, 0.71073 Å                                  | MoKα, 0.71073 Å                                                 |
| Data Refinement                                    |                                                  |                                                                 |
| Final R indices <sup>a</sup>                       | R1 = 0.0411, wR2 = 0.0852                        | R1 = 0.0779, wR2 = 0.1472                                       |
| Largest diff. peak<br>and hole (eÅ <sup>-3</sup> ) | 1.345 and -0.851                                 | 1.864 and -1.467                                                |

<sup>a</sup>Number of observed reflections: **2**, 7516 ( $I_o > 2\sigma I_o$ ),  $R_1 = \sum (|F_o| - |F_c|) / \sum |F_o|$ ,  $wR_2 = [ \sum w (|F_o|^2 - |F_c|^2)^2 / \sum w F_o^4 ]^{1/2}$ ,  $w = [ \sigma^2 F_o^2 + (0.0534 \cdot p) ]^{-1}$ ,  $p = [F_o^2 + 2 \cdot F_c^2] / 3$ . **6**, 8079 ( $I_o > 2\sigma I_o$ ),  $R_1 = \sum (|F_o| - |F_c|) / \sum |F_o|$ ,  $wR_2 = [ \sum w (|F_o|^2 - |F_c|^2)^2 / \sum w F_o^4 ]^{1/2}$ ,  $w = [ \sigma^2 F_o^2 + (0.0354 \cdot p) ]^{-1}$ ,  $p = [F_o^2 + 2 \cdot F_c^2] / 3$ .
